# Supplementary material for: Design, synthesis and molecular modeling of new coumarin–thiazole derivatives as dual EGFR/HDAC1 inhibitors: in vitro and in vivo anticancer assays
Source: Royal Society of Chemistry journal article supplement (doi:10.1039/d5ra04395f), 2025-01-01
Supplement: d5ra04395f1.pdf [file d5ra04395f1.pdf]

## Supplementary Material

- $^1\text{H}$ NMR of target compounds 3a-o
- $^{13}\text{C}$ NMR of target compounds 3a-o

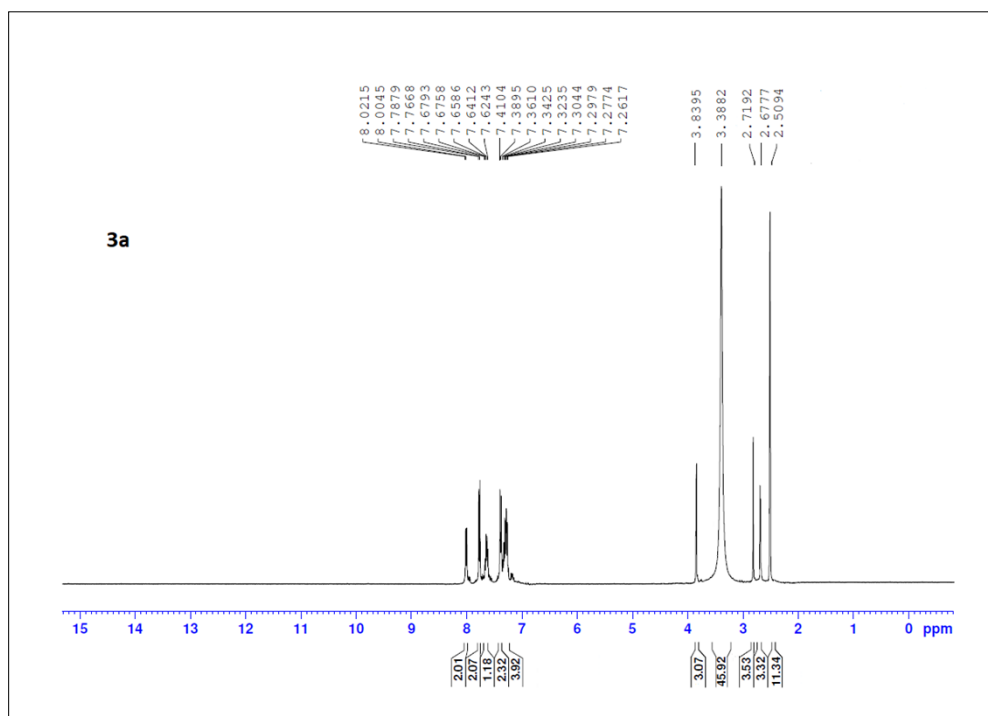

# <sup>1</sup>HMR of target compounds 3a

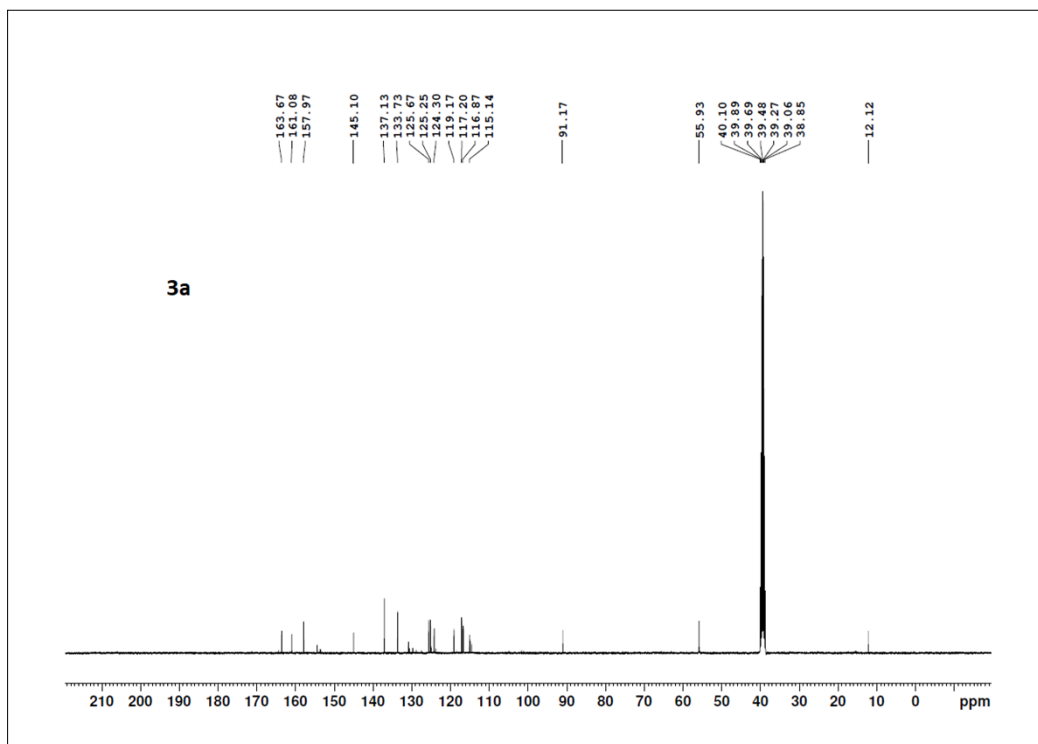

# <sup>13</sup>CNMR of target compounds 3a

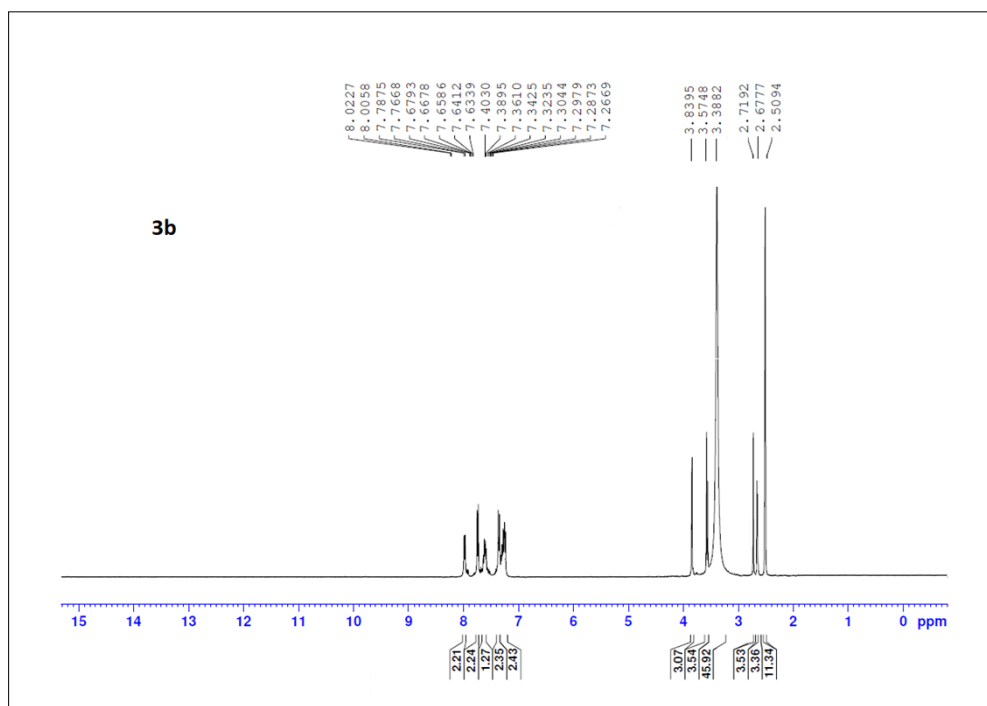

# <sup>1</sup>HMNR of target compounds 3b

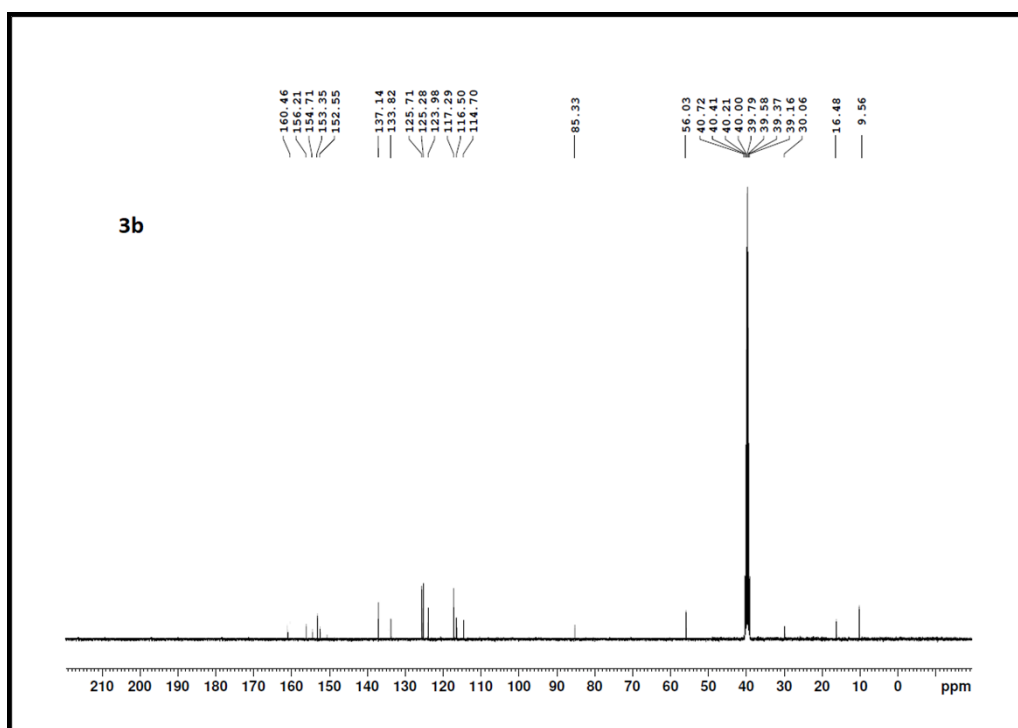

# <sup>13</sup>CNMR of target compounds 3b

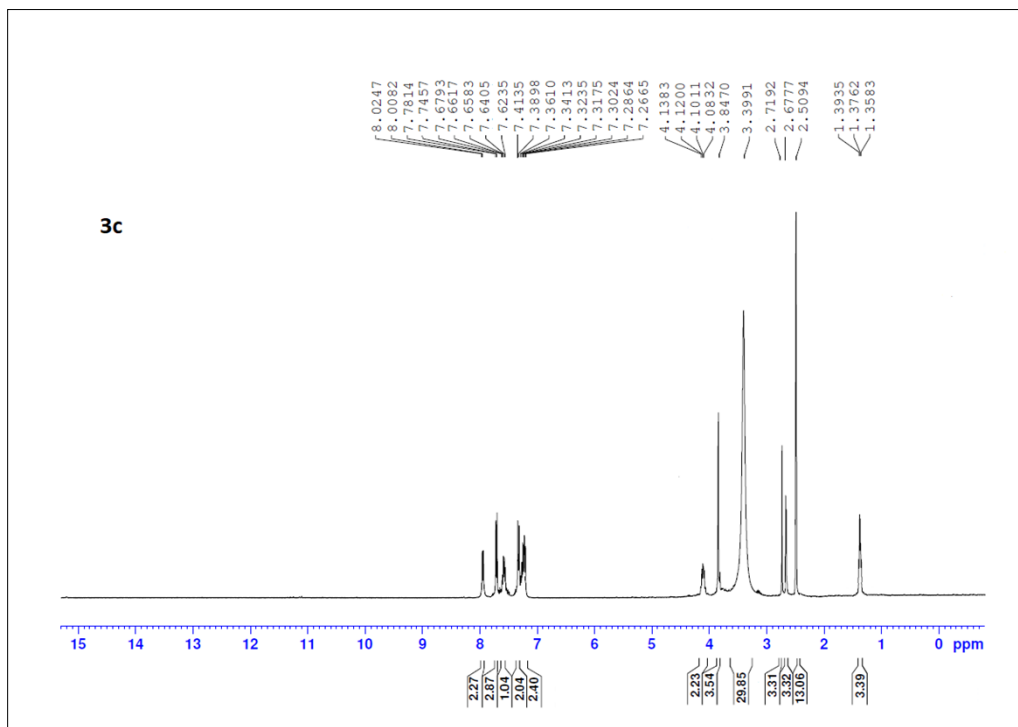

# <sup>1</sup>HMNR of target compounds 3c

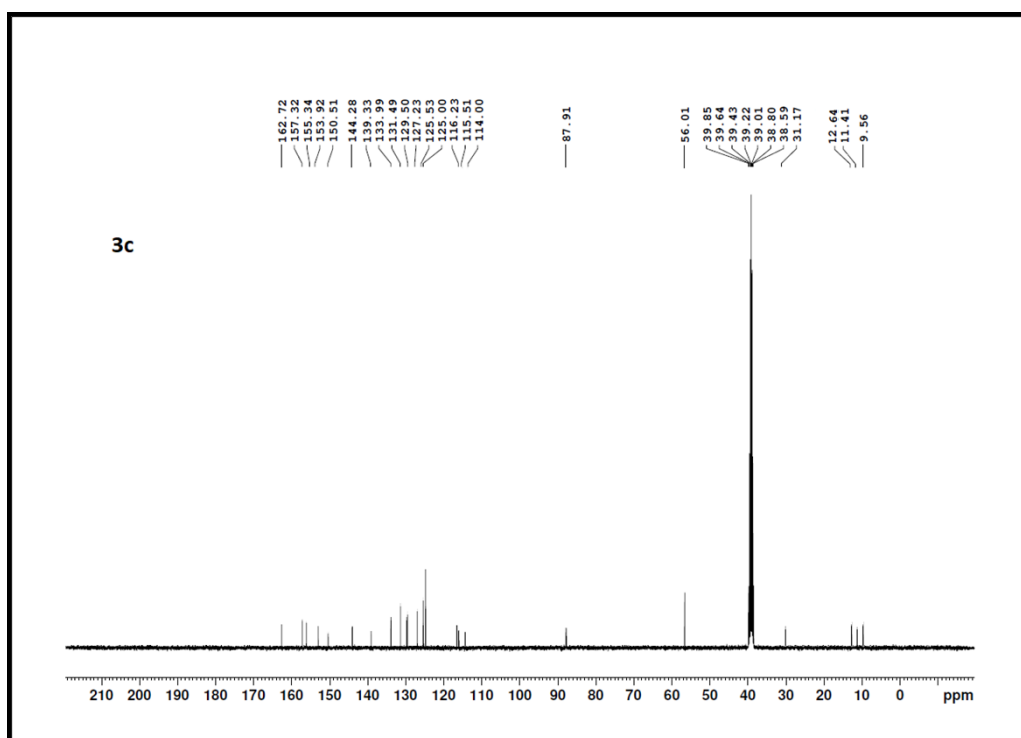

# <sup>13</sup>CNMR of target compounds 3c

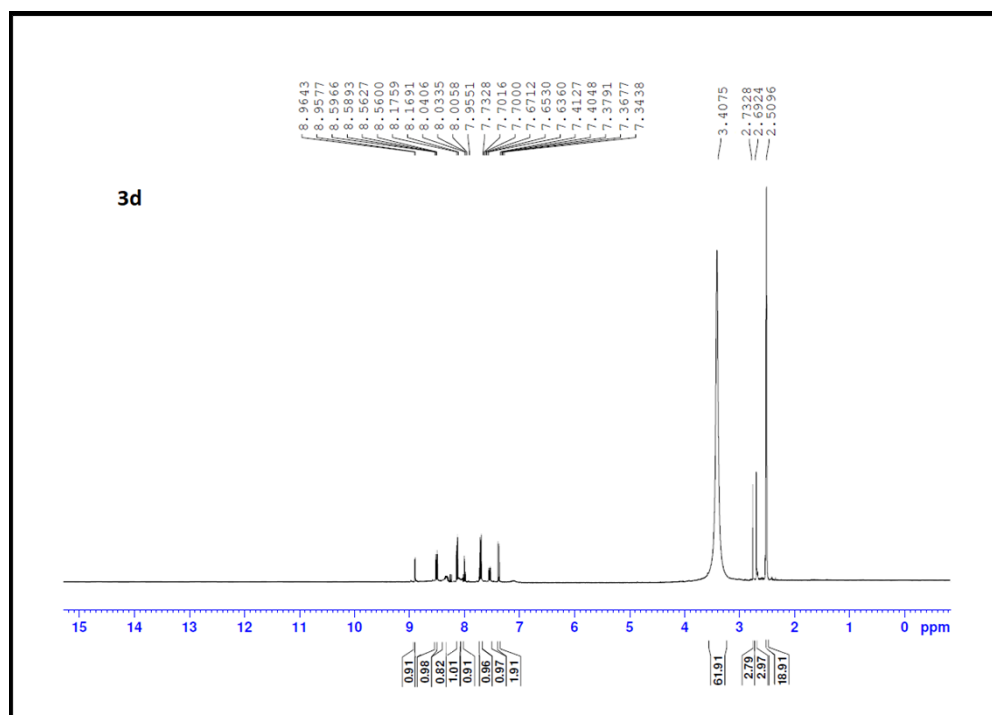

### <sup>1</sup>HMR of target compounds 3d

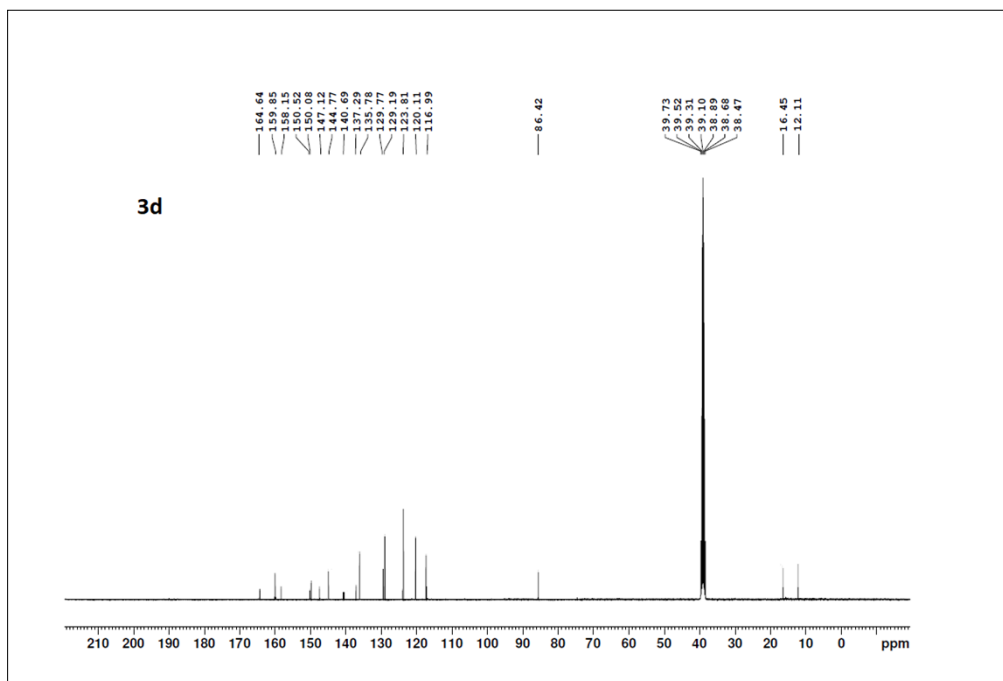

### <sup>13</sup>CNMR of target compounds 3d

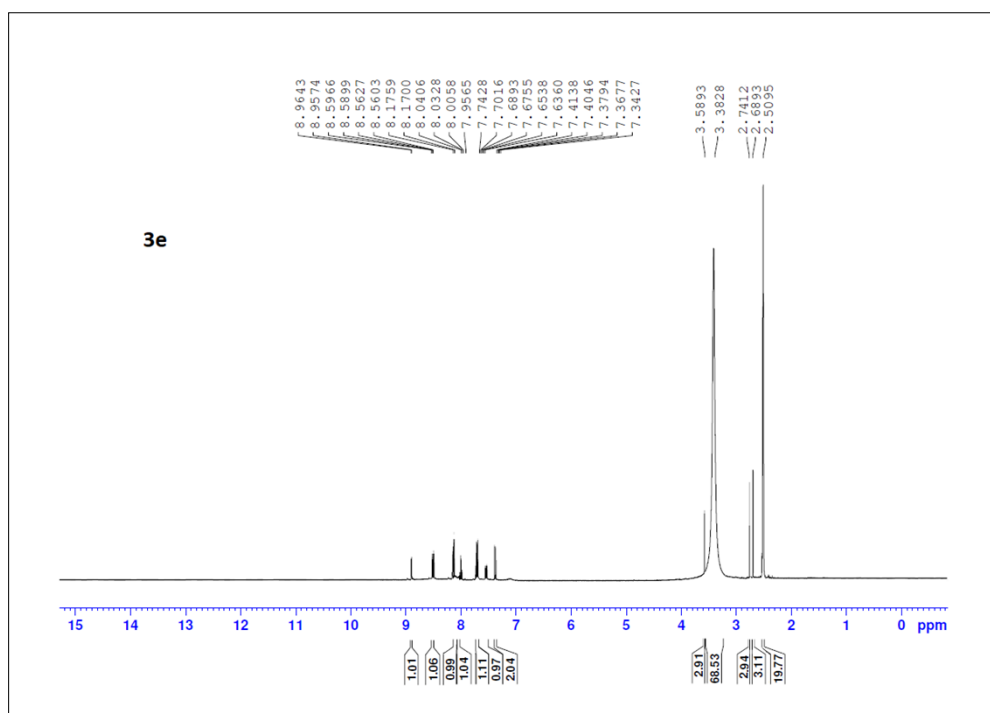

### <sup>1</sup>HMR of target compounds 3e

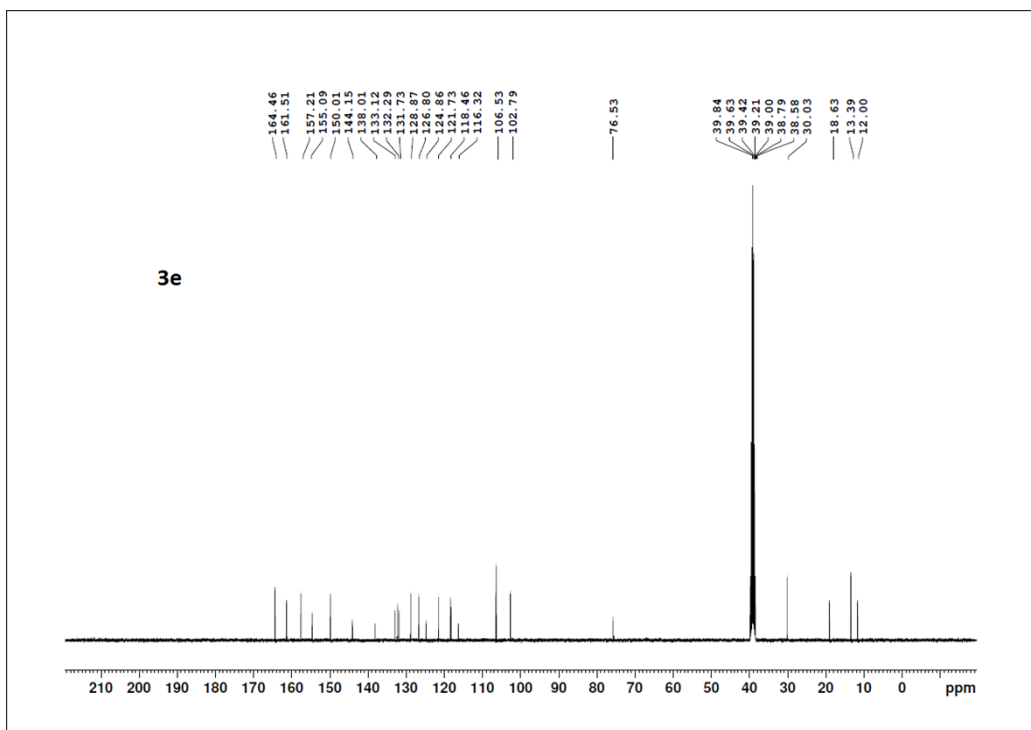

**$^{13}\text{C}$ NMR of target compounds 3e**

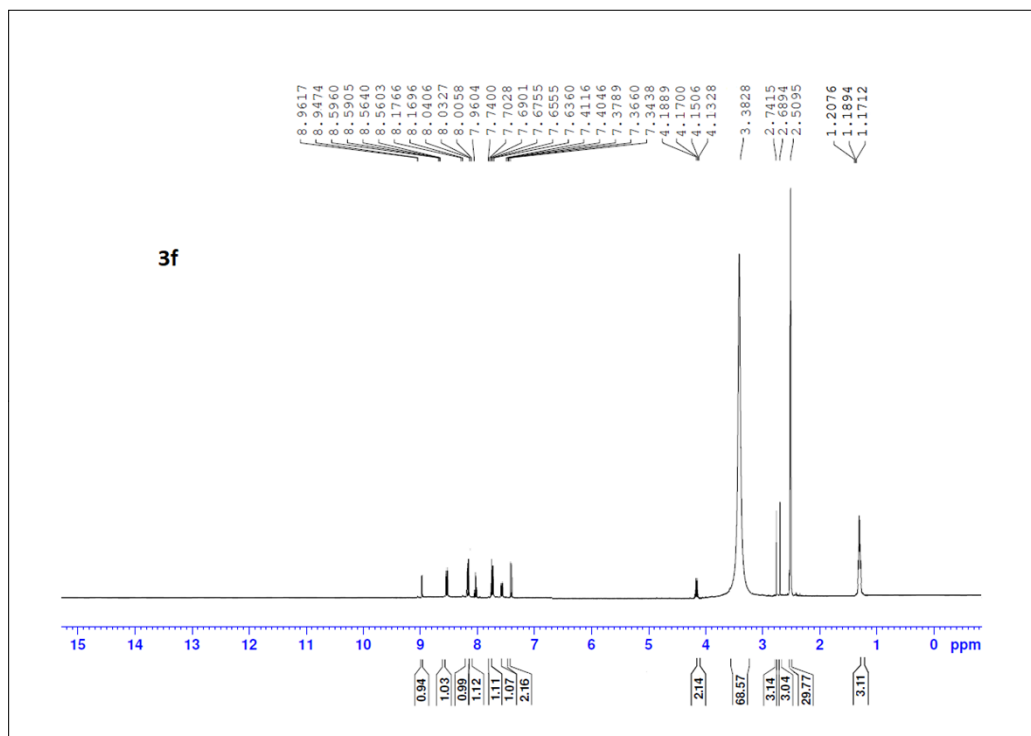

**$^1\text{H}$ NMR of target compounds 3f**

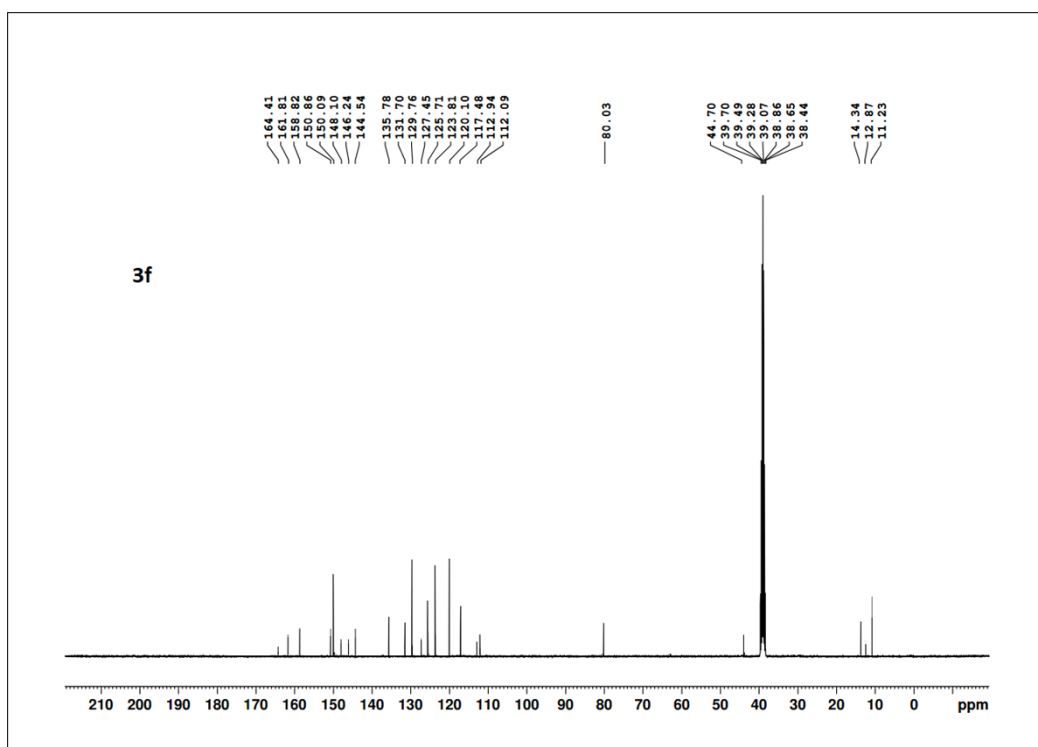

**$^{13}\text{C}$ NMR of target compounds 3f**

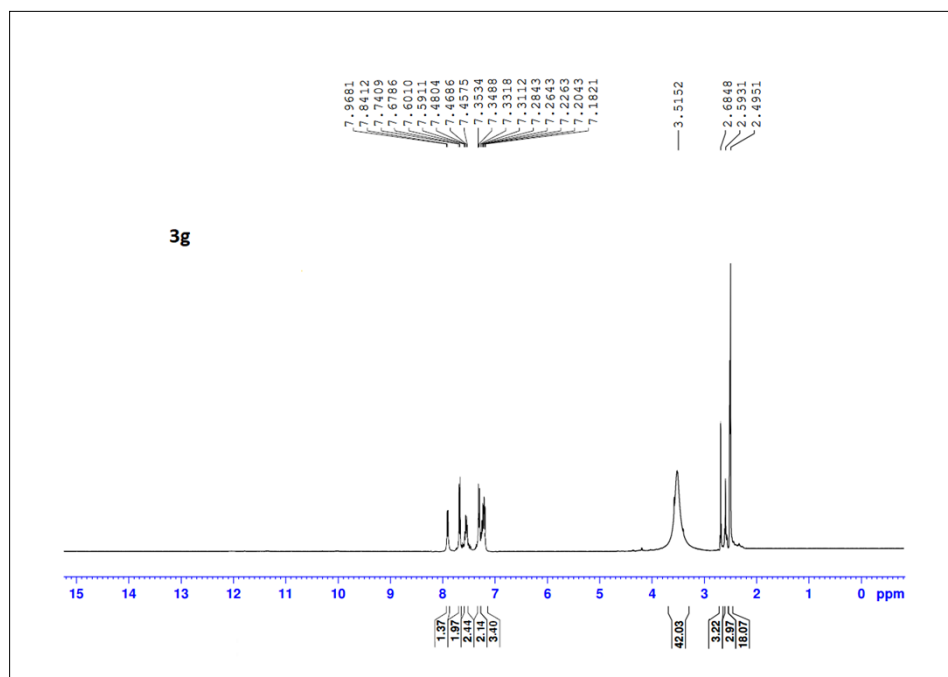

**$^1\text{H}$ NMR of target compounds 3g**

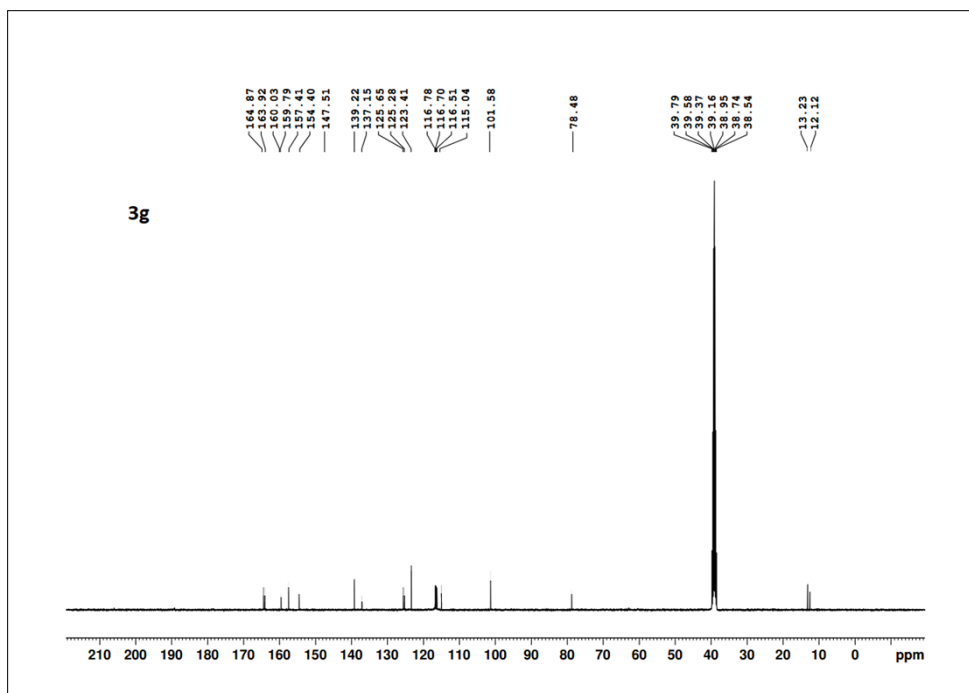

**$^{13}\text{C}$ NMR of target compounds 3g**

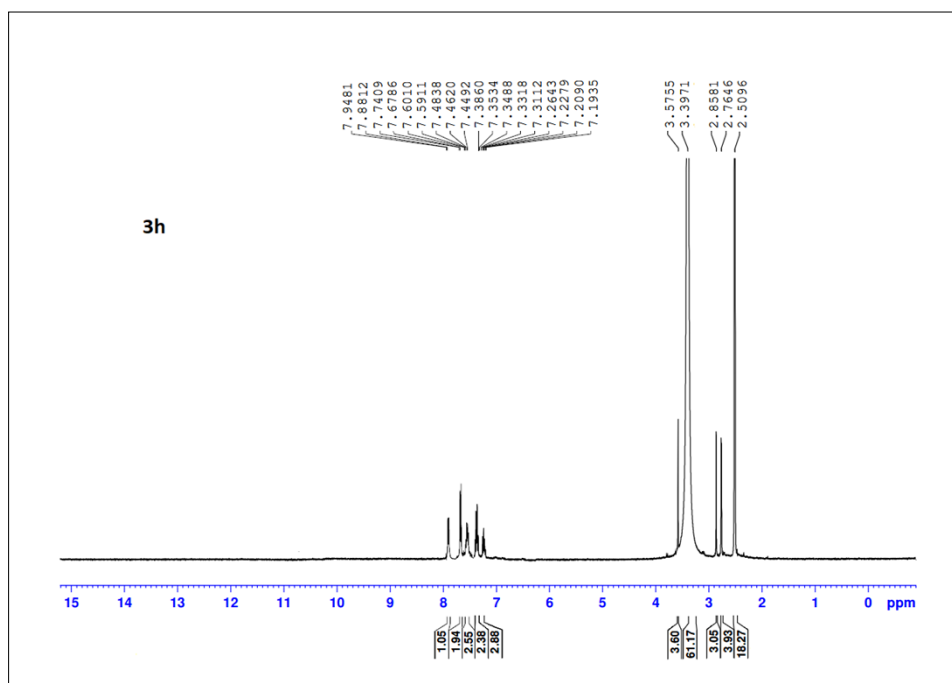

**$^1\text{H}$ NMR of target compounds 3h**



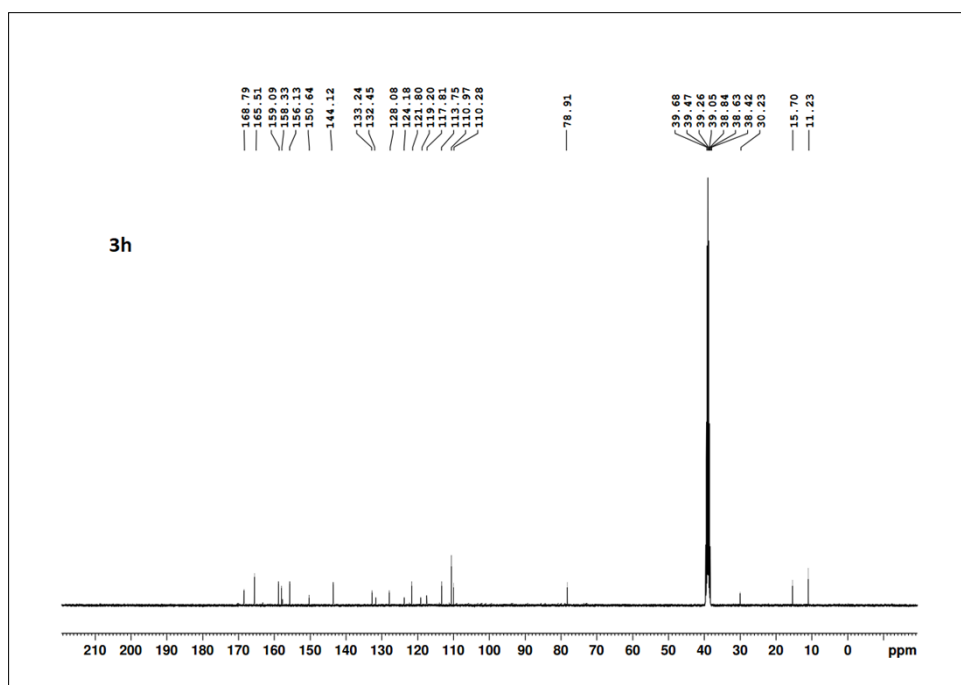

**$^{13}\text{C}$ NMR of target compounds 3h**

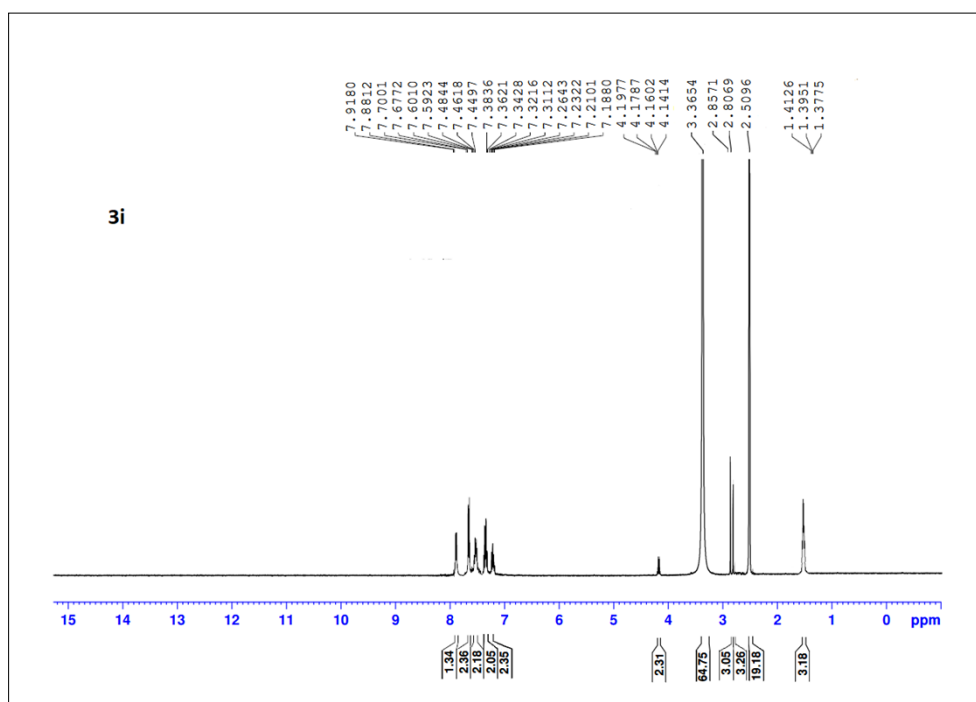

**$^1\text{H}$ NMR of target compounds 3i**

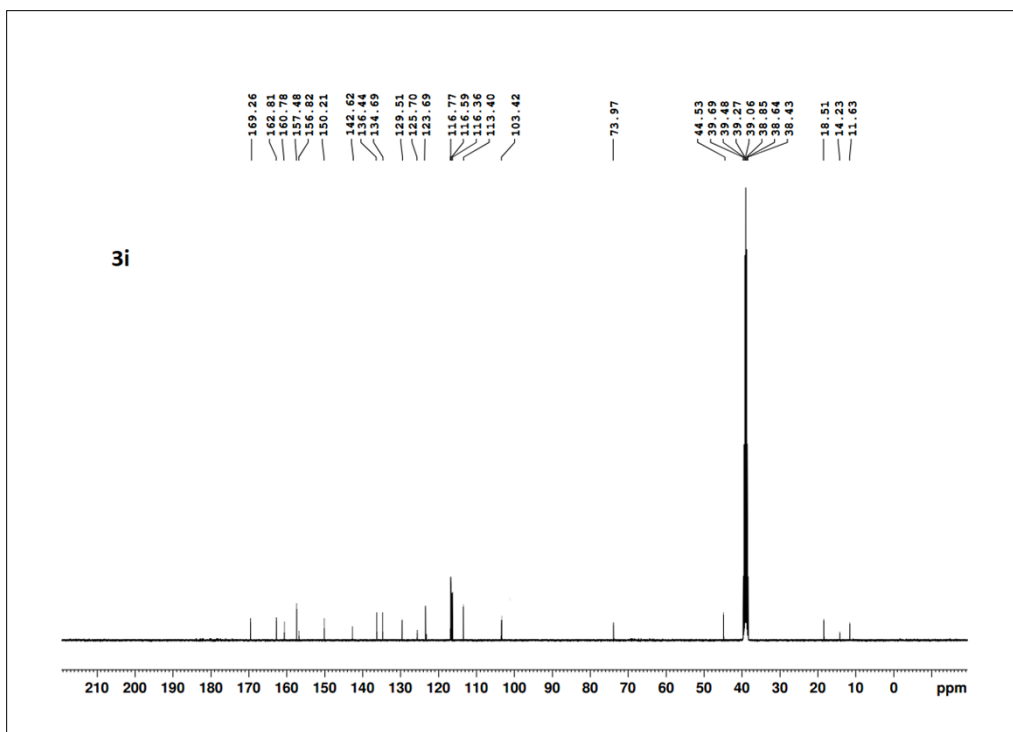

**$^{13}\text{C}$ NMR of target compounds 3i**

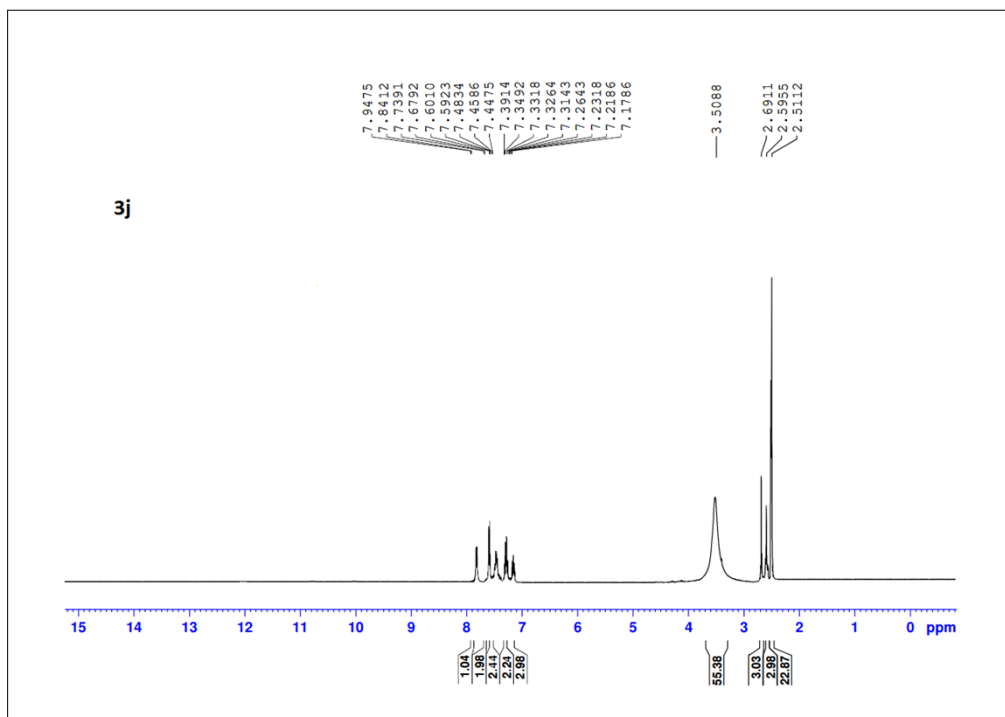

**$^1\text{H}$ NMR of target compounds 3j**

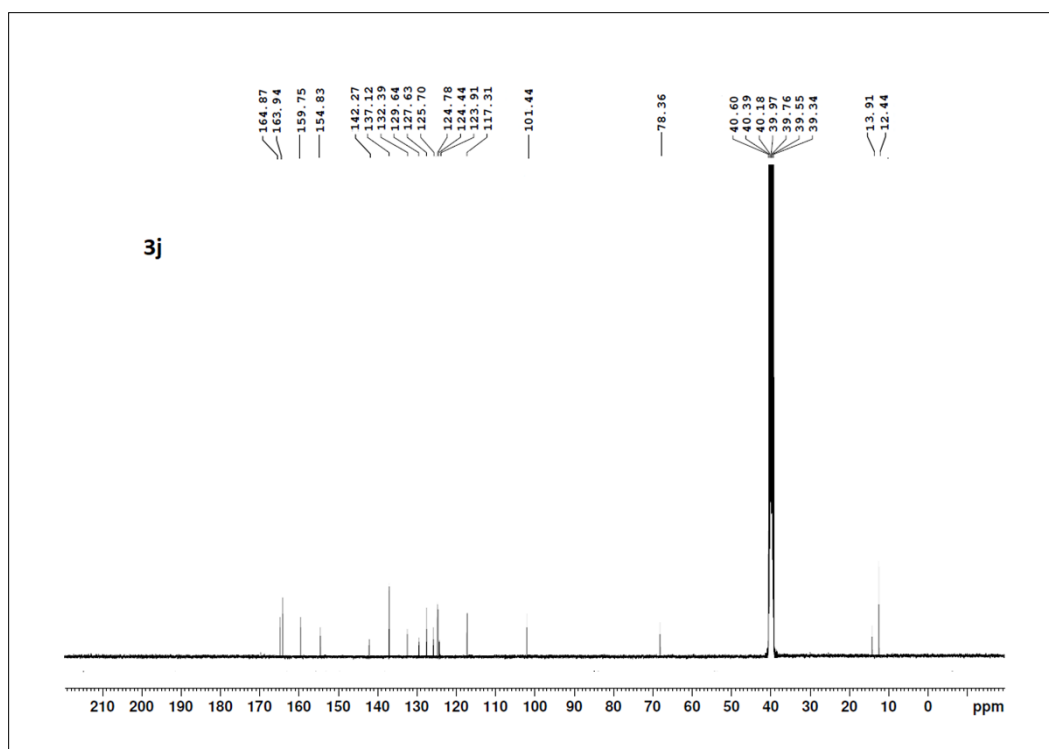

**<sup>13</sup>CNMR of target compounds 3j**

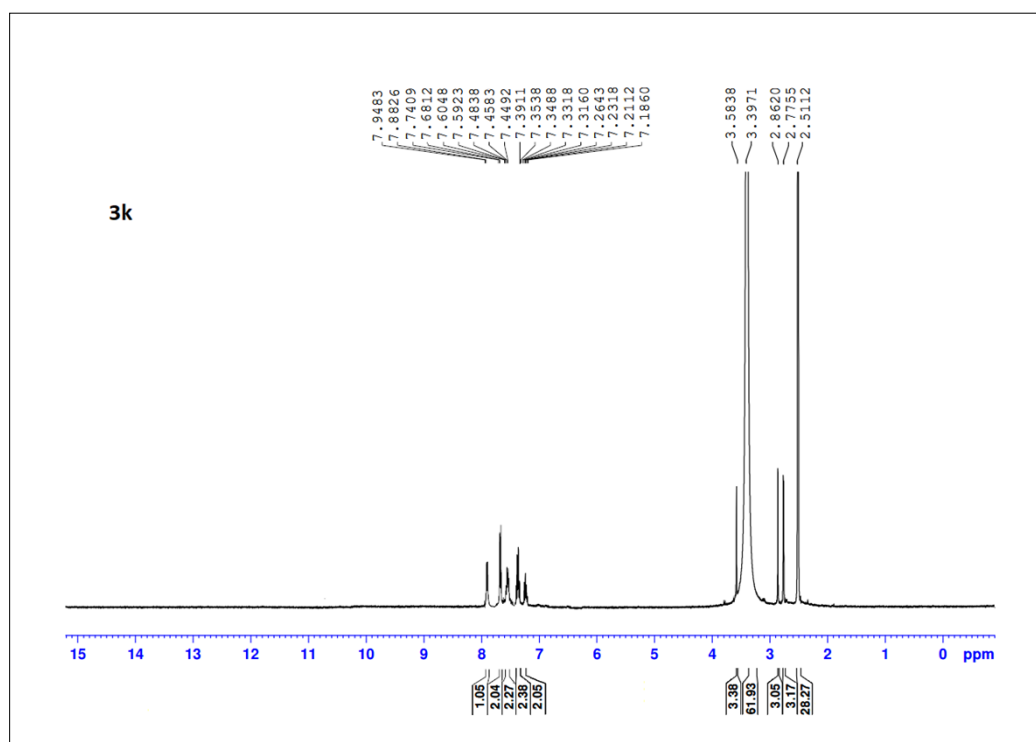

### <sup>1</sup>HMR of target compounds 3k

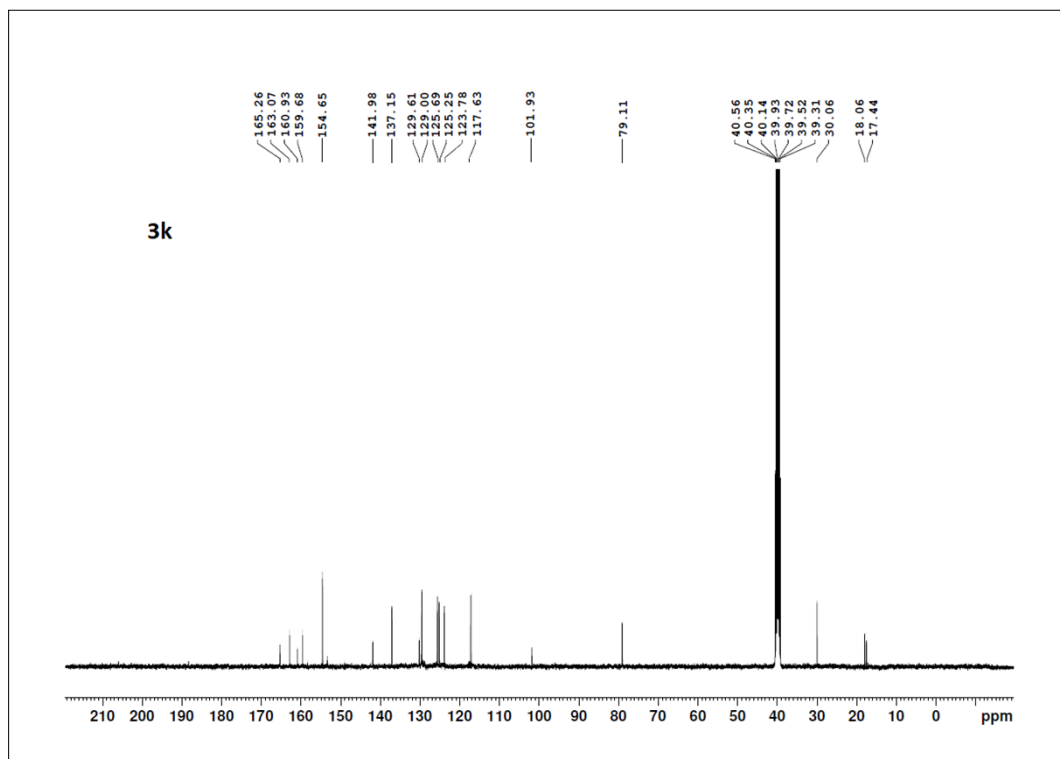

### <sup>13</sup>CNMR of target compounds 3k

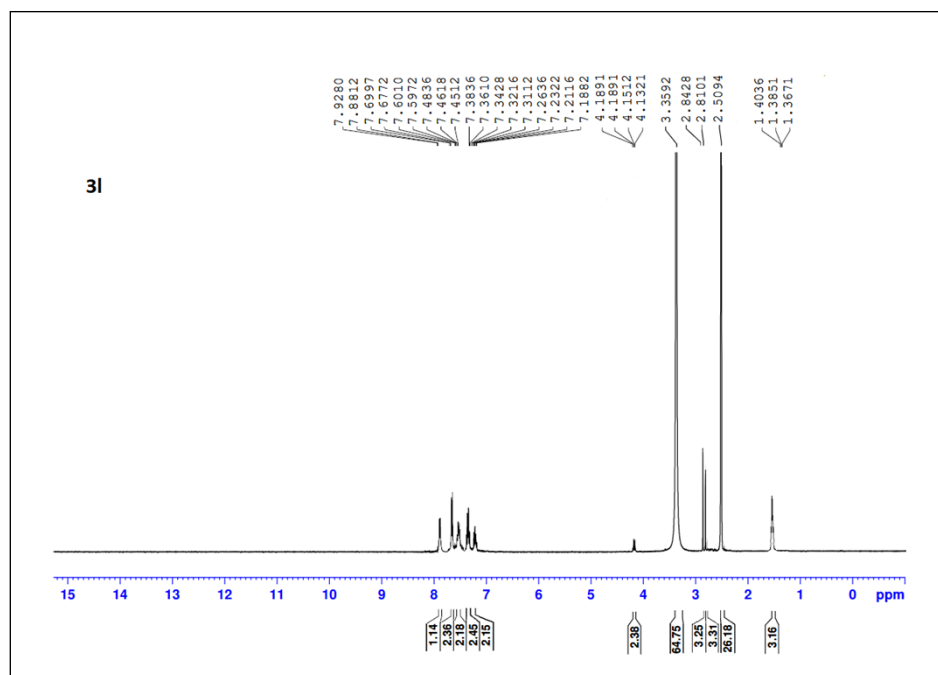

### <sup>1</sup>HMR of target compounds 3l



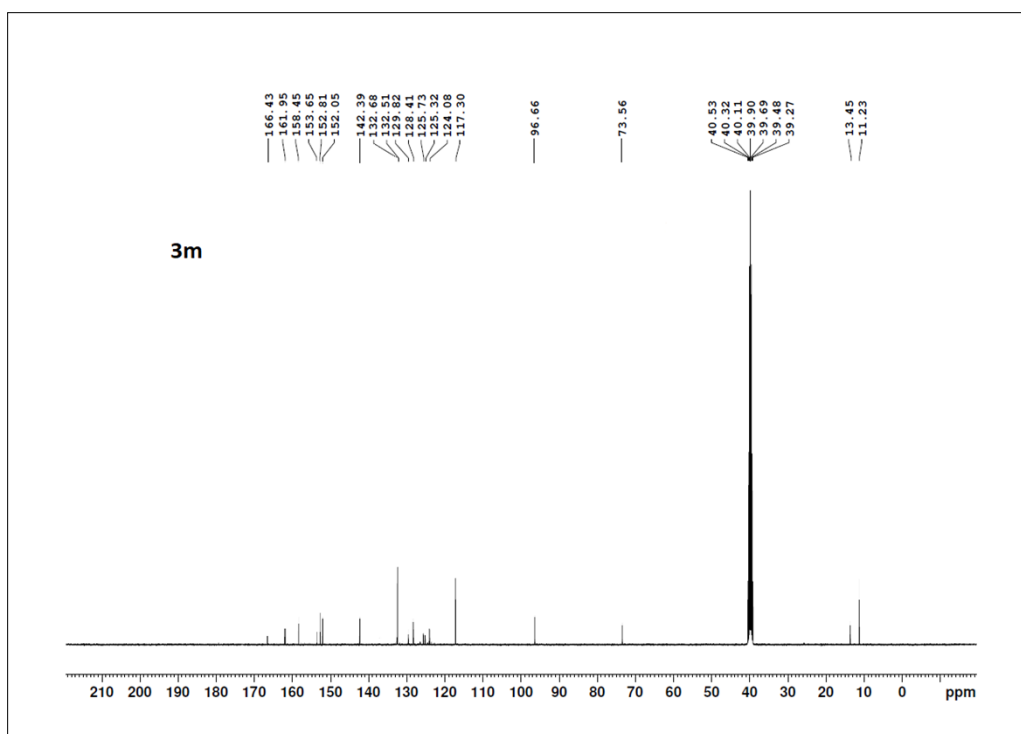

**$^{13}\text{C}$ NMR of target compounds 3m**

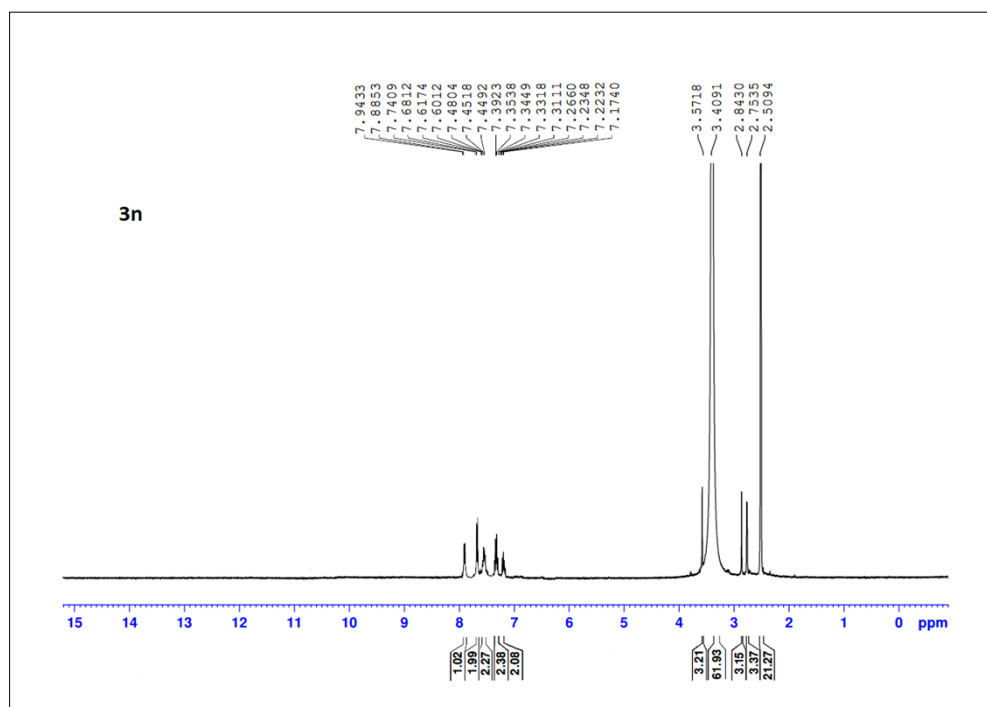

**$^1\text{H}$ NMR of target compounds 3n**

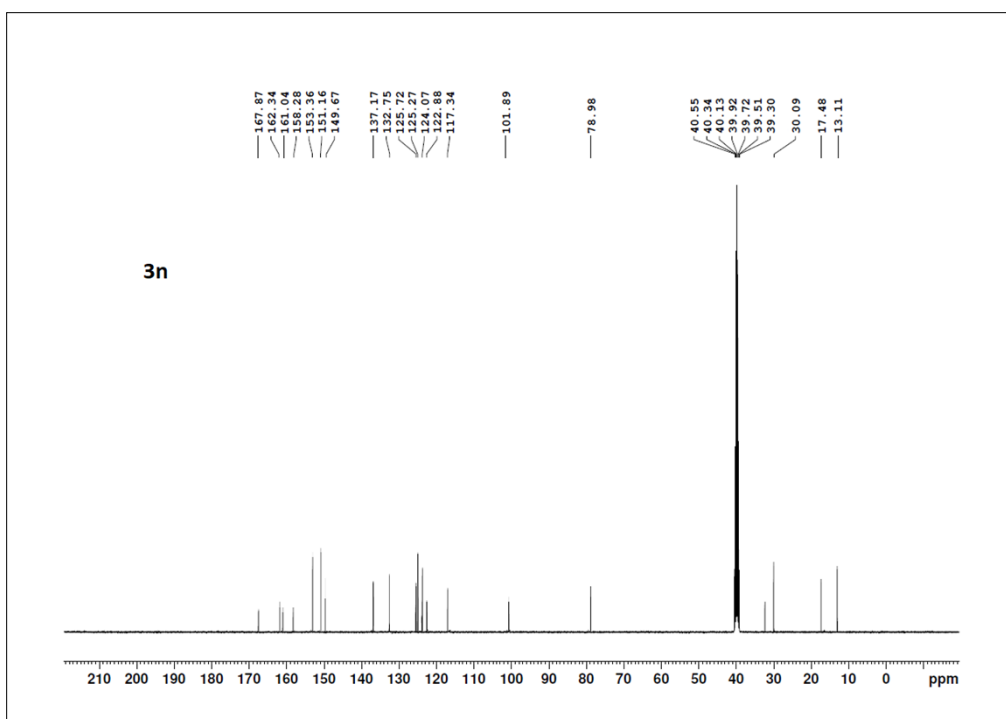

**$^{13}\text{C}$ NMR of target compounds 3n**

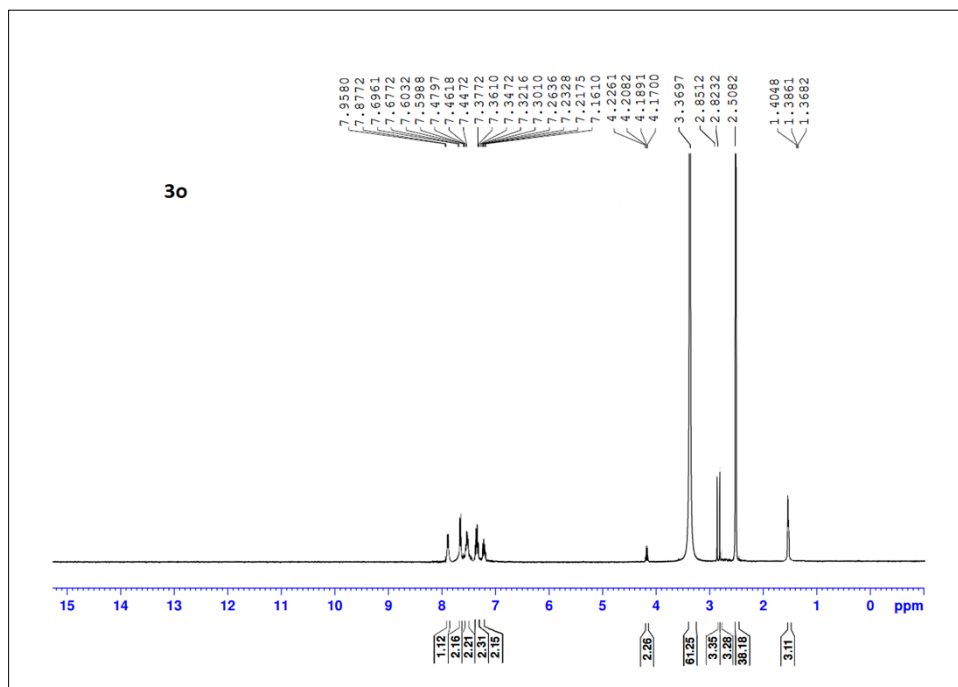

**$^1\text{H}$ NMR of target compounds 3o**

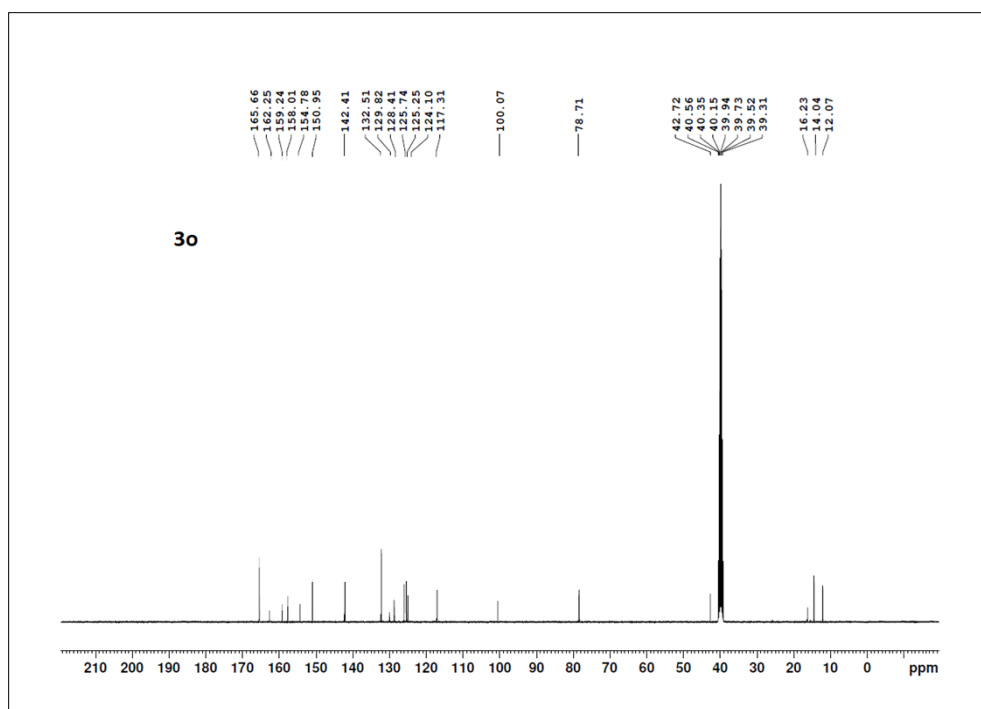

**$^{13}\text{C}$ NMR of target compounds 3o**
